# Supplementary material for: A Metabolomic and Lipidomic Serum Signature from Nonhuman Primates Administered with a Promising Radiation Countermeasure, Gamma-Tocotrienol
Source: Int J Mol Sci. 2017 Dec 28;19(1):79. doi: 10.3390/ijms19010079 (PMC5796029; doi:10.3390/ijms19010079)
Supplement: Supplementary file 1 [file ijms-19-00079-s001.zip › Supplemental Table S1 - AFFRI_Validated_Metabolites_List.xlsx]

## Sheet: Sheet1
	Supplementary Table S1: List of all validated metabolites. This table includes all validated, statistically significantly changed biomarkers (p < 0.05).
	Metabolite	m/z	Mass Error(ppm)	Retention Time(min)	Gradient	Mode	p-value	CID Fragments
	17-phenyl trinor Prostaglandin E2 serinol amide	460.269	0	0.74	Lipidomics	POS	3.07e-63	135.0800, 119.0859, 107.0842
	Pro Leu(or Ile)	229.155	0	0.36	Metabolomics	POS	2.07e-12	70.0645
	Cholic Acid	407.279	4	4.07	Metabolomics	NEG	3.22e-12	69.0354
	Lactic Acid	89.0235	10	0.43	Metabolomics	NEG	1.77e-11	71.0153
	Hexadecyl Acetyl Glycerol	359.316	2	7.43	Metabolomics	POS	3.59e-11	341.3021, 267.2645, 123.1137, 109.1006, 95.0853, 85.1008, 71.0849, 57.0694
	PI(20:4)	619.289	0	5.46	Metabolomics	NEG	2.78e-10	315.0487, 303.2330, 241.0119, 152.9958, 96.9696, 78.9591
	Alpha-N-Phenylacetyl-L-glutamine	263.102	7	1.89	Metabolomics	NEG	2.56e-09	145.0613, 128.0348, 127.0507
	Tryptophan	203.081	6	0.96	Metabolomics	NEG	3.16e-09	142.0692, 116.0509, 74.0261
	Propionyl-L-Carnitine	218.138	3	0.57	Lipidomics	POS	3.26e-09	144.1020, 85.0284, 60.0808
	9-octadecenal	267.269	3	7.43	Metabolomics	POS	3.88e-09	249.2577, 193.1940, 165.1631, 151.1482, 137.1318, 123.1167, 111.1159, 109.1015, 97.1012, 95.0859, 85.1003, 81.0701, 71.0861, 67.0548, 57.0700, 55.0553
	2-hexadecenal	239.238	3	6.68	Metabolomics	POS	6.76e-09	221.2249, 165.1615, 137.1310, 123.1150, 109.1017, 97.1024, 95.0859, 85.1024, 81.0704, 71.0847, 67.0550, 57.0687, 43.0549
	Tryptophan	205.098	4	1.15	Metabolomics	POS	1.58e-08	188.0702, 146.0595, 144.0804, 132.0801, 118.0653
	Arachidonic Acid	319.262	2	7.58	Metabolomics	POS	2.21e-07	269.2232, 259.2290, 245.2252, 221.1551, 203.1705, 133.0998, 121.1004, 119.0854, 109.0995, 107.0853, 105.0691, 95.0849, 93.0700, 91.0524, 81.0770, 67.0547
	Docosahexaenoic Acid	357.279	1	4.67	Metabolomics	POS	3.61e-07	221.1497, 215.1773, 161.1310, 147.1125, 145.0990, 135.1156, 119.0845, 107.0852, 81.0698
	10-oxo-nonadecanoic Acid	313.274	2	6.68	Metabolomics	POS	8.53e-07	109.1010, 97.1012, 85.1012, 71.0855, 57.0699
	PS(16:0/21:0)	804.575	2	5.56	Lipidomics	NEG	1.37e-06	255.233
	Phenylalanine	166.087	5	0.59	Metabolomics	POS	1.73e-06	120.0802, 103.0539, 93.0692
	Adrenochrome	178.05	6	1.71	Metabolomics	NEG	3.98e-06	134.058
	PC(20:5/20:5)	826.521	0	8.51	Metabolomics	POS	6.5e-06	643.468, 184.0743
	PS(18:2/21:0)	828.574	3	5.31	Lipidomics	NEG	7.81e-06	279.232
	3-Deoxyvitamin D3	369.352	2	9.06	Metabolomics	POS	1.37e-05	287.2730, 133.1010, 119.0860, 95.0855, 93.0699
	PC(20:5/22:4)	856.565	0	8.63	Metabolomics	POS	1.94e-05	184.075
	MG(18:0/0:0/0:0)	359.314	4	3.11	Lipidomics	POS	6.87e-05	341.3050, 285.2790, 267.2680, 249.2580, 95.0853, 85.1012, 71.0855, 57.0699
	PC(O-18:0/20:4)	830.592	0	5.68	Lipidomics	NEG	7.94e-05	794.5696, 303.2319
	LysoPC(18:2)	520.34	0	1.18	Lipidomics	POS	7.96e-05	502.3279, 184.0736, 104.1075
	LysoPC(20:4)	544.34	0	1.15	Lipidomics	POS	9.35e-05	184.0736, 104.1075, 86.0972
	PC(17:0/20:4)	813.623	0	10.12	Metabolomics	POS	9.68e-05	184.074
	PC(20:4/20:5)	828.551	3	8.91	Metabolomics	POS	0.00030506	645.4842, 184.0743, 86.0977
	PC(16:1/22:6)	804.551	3	9.03	Metabolomics	POS	0.00036618	621.4852, 184.0744, 86.0976
	LysoPC(15:0)	482.324	0	6.03	Metabolomics	POS	0.00036884	184.0741, 104.1079, 86.0975
	PC(20:4/22:6)	854.563	7	8.49	Metabolomics	POS	0.00043725	184.074
	Glycidyl Stearate	341.305	2	3.11	Lipidomics	POS	0.00044613	285.2790, 267.2680, 249.2580, 85.1012, 71.0855, 69.0699, 57.0699
	9-Keto heptadecylic Acid	285.241	6	5.89	Metabolomics	POS	0.00049539	97.1012, 95.0855, 85.1012, 71.0821
	Methyl-9,10-epoxy-12,15-octadecadienoate	309.242	1	7.61	Metabolomics	POS	0.00050337	277.2160, 259.2060, 119.0860, 109.1010, 95.0855, 81.0699
	LysoPC(22:6)	568.339	3	5.13	Metabolomics	POS	0.00053357	483.2479, 184.0743, 104.108, 86.0975
	PE(18:1)	478.293	2	5.45	Metabolomics	NEG	0.00062005	281.2485, 214.0485, 196.0379, 140.0126
	PC(18:1/22:6)	832.584	1	8.94	Metabolomics	POS	0.00095699	184.0743, 86.0977
	LysoPC(18:1)	522.356	1	5.53	Metabolomics	POS	0.0010468	504.3448, 184.0743, 104.1079, 86.0976
	LysoPC(18:2)	520.34	1	5.14	Metabolomics	POS	0.0011251	502.3291, 184.0743, 104.108, 86.0975
	LysoPC(20:5)	542.322	4	5.14	Metabolomics	POS	0.0012955	184.0743, 104.108, 86.0975
	PC(16:0/22:5)	808.582	4	9.04	Metabolomics	POS	0.0013416	790.5756, 184.0744, 86.0976
	PC(18:1/22:6)	832.585	1	5.04	Lipidomics	POS	0.0021133	184.074, 86.0973
	LysoPC(20:3)	546.355	2	5.33	Metabolomics	POS	0.0024127	184.0743, 104.108, 86.0976
	LysoPC(13:0)	454.293	3	5.34	Metabolomics	POS	0.0024792	184.0743, 104.108, 86.0976
	2-Arachidonoylglycerophosphocholine	545.342	10	1.15	Lipidomics	POS	0.0032555	544.3392, 526.3292, 258.1101, 184.0733, 86.0964
	L-Histidine	154.061	5	0.63	Lipidomics	NEG	0.0034531	137.0327, 109.0405, 93.0457, 81.0470
	PC(16:0/16:1)	732.553	1	9.19	Metabolomics	POS	0.0039224	184.0744, 86.0977
	(2or16)-Hydorxyhexadecanoic Acid	271.226	5	6.09	Metabolomics	NEG	0.0051883	225.222
	Stearic Acid	285.279	2	7.43	Metabolomics	POS	0.0056163	243.2297, 201.1803, 187.1669, 149.1305, 121.1004, 117.0899, 103.0744, 89.0593, 85.1007, 83.0846, 81.0701, 75.0435, 71.0853, 69.0701, 67.0537, 57.0702
	LysoPC(20:4)	544.339	1	5.14	Metabolomics	POS	0.0080421	184.0743, 104.108, 86.0975
	Indoxylsulfuric Acid	212.001	6	1.25	Metabolomics	NEG	0.0085296	132.0448, 80.9653, 79.9576
	PC(18:3/18:3)	778.532	8	8.74	Metabolomics	POS	0.011305	693.4429, 595.4697, 184.0742
	PT(18:0/18:1)	802.56	0	5.24	Lipidomics	NEG	0.011578	766.5404,281.2463
	PC(16:0/18:1)	760.584	1	9.95	Metabolomics	POS	0.012254	184.074
	PC(16:0/22:4)	810.6	1	9.72	Metabolomics	POS	0.012355	184.074
	Arachidonic Acid Ethyl Ester	333.28	3	7.19	Metabolomics	POS	0.015634	121.1012, 107.0845, 91.0547, 81.0699, 79.0541, 69.0703, 67.0547
	PC(15:0/18:2)	761.588	6	9.94	Metabolomics	POS	0.018096	184.074
	Gln Leu Lys	388.254	6	2.25	Metabolomics	POS	0.023474	371.2280, 133.0858, 89.0592
	(Iso)Butyryl Carnitine	232.156	8	0.56	Metabolomics	POS	0.028153	173.0816, 85.0296
	Tetradecylamine	214.253	0	4.22	Metabolomics	POS	0.029441	71.0867
	LysoPC(O-16:0/1:0)	510.356	1	5.68	Metabolomics	POS	0.030727	184.0739, 104.1081
	PC(16:0/22:6)	806.569	1	8.91	Metabolomics	POS	0.031617	184.0743, 86.0977
	Anhydroretinol	269.225	4	6.56	Metabolomics	POS	0.045273	199.1487, 159.1174, 133.1017, 93.0704, 81.0704
	PC(20:4/20:4)	830.569	1	8.59	Metabolomics	POS	0.049606	184.075
