# Supplementary material for: A Metabolomic and Lipidomic Serum Signature from Nonhuman Primates Administered with a Promising Radiation Countermeasure, Gamma-Tocotrienol
Source: Int J Mol Sci. 2017 Dec 28;19(1):79. doi: 10.3390/ijms19010079 (PMC5796029; doi:10.3390/ijms19010079)
Supplement: Supplementary file 1 [file ijms-19-00079-s001.zip › Supplemental Table S2 - FDR values dose and gender.xlsx]

## Sheet: Sheet1
Supplemental Table S2 - FDR values dose and gender
A	Males vs. Females (t-test)
	Pre	0.25 h	0.5 h	1 h	2 h	4 h	8 h	12 h	1 d	2 d	3 d	4 d	5 d	6 d	7 d	10 d	14 d	20 d
Stearic Acid	-	-	-	-	-	-	-	-	-	-	-	-	-	-	-	-	-	-
Pro Leu	-	-	-	-	-	-	-	-	-	-	-	-	-	-	-	-	-	-
Cholic Acid	-	-	-	-	-	-	-	-	-	-	-	-	-	-	-	-	-	-
Lactic Acid	-	-	-	-	-	-	-	-	-	-	-	-	-	-	-	-	-	-
Hexadecyl Acetyl Glycerol	-	-	-	-	-	-	-	-	-	-	-	-	-	-	-	-	-	-
PI(20:4)	-	-	-	-	-	-	-	-	-	-	-	-	-	-	-	-	-	-
Alpha-N-Phenylacetyl-L-glutamine	-	-	-	-	-	-	-	-	-	-	-	-	-	-	-	-	-	-
Tryptophan	-	-	-	-	-	-	-	-	-	-	-	-	-	-	-	-	-	-
Propionyl-L-Carnitine	-	-	-	-	-	-	-	-	-	-	-	-	-	-	-	-	-	-
9-octadecenal	-	-	-	-	-	-	-	-	-	-	-	-	-	-	-	-	-	-
2-hexadecenal	-	-	-	-	-	-	-	-	-	-	-	-	-	-	-	-	-	-
Arachidonic Acid	-	-	-	-	-	-	-	-	-	-	-	-	-	-	-	-	-	-
Docosahexaenoic Acid	-	-	-	-	-	-	-	-	-	-	-	-	-	-	-	-	-	-
10-oxo-nonadecanoic Acid	-	-	-	-	-	-	-	-	-	-	-	-	-	-	-	-	-	-
PS(16:0/21:0)	-	-	-	-	-	-	-	-	-	-	-	-	-	-	-	-	-	-
Phenylalanine	-	-	-	-	-	-	-	-	-	-	-	-	-	-	-	-	-	-
L-Histidine	-	-	-	-	-	-	-	-	-	-	-	-	-	-	-	-	-	-
PC(20:5/20:5)	-	-	-	-	-	-	-	-	-	-	-	-	-	-	-	-	-	-
Butyryl Carnitine	-	-	-	-	-	-	-	-	-	-	-	-	-	-	-	-	-	-
3-Deoxyvitamin D3	-	-	-	-	-	-	-	-	-	-	-	0.0416249	-	-	-	-	-	-
B	9.375 mg/kg vs. 18.75 mg/kg vs. 37.5 mg/kg (ANOVA)
	Pre	0.25 h	0.5 h	1 h	2 h	4 h	8 h	12 h	1 d	2 d	3 d	4 d	5 d	6 d	7 d	10 d	14 d	20 d
Stearic Acid	-	-	-	-	-	-	-	-	-	-	-	-	-	-	-	-	-	-
Pro Leu	-	-	-	-	-	-	-	-	-	-	-	-	-	0.0281083	-	-	-	-
Cholic Acid	-	-	-	-	-	-	-	-	-	-	-	-	-	-	-	-	-	-
Lactic Acid	-	-	-	-	-	-	-	-	-	-	-	-	-	-	-	-	-	-
Hexadecyl Acetyl Glycerol	-	-	-	-	-	-	-	-	-	-	-	-	-	-	-	-	-	-
PI(20:4)	-	-	-	-	-	-	-	-	-	-	-	-	-	-	-	-	-	-
Alpha-N-Phenylacetyl-L-glutamine	-	-	-	-	-	-	-	-	-	-	-	-	-	-	-	-	0.0276151	-
Tryptophan	-	-	-	-	-	-	-	-	-	-	-	-	-	-	-	-	-	-
Propionyl-L-Carnitine	-	-	-	-	-	-	-	-	-	-	-	-	-	-	-	-	-	-
9-octadecenal	-	-	-	-	-	-	-	-	-	-	-	-	-	-	-	-	-	-
2-hexadecenal	-	-	-	-	-	-	-	-	-	-	-	-	-	-	-	-	-	-
Arachidonic Acid	-	-	-	-	-	-	-	-	-	-	-	-	-	-	-	-	-	-
Docosahexaenoic Acid	-	-	-	-	-	-	-	-	-	-	-	-	-	-	-	-	-	-
10-oxo-nonadecanoic Acid	-	-	-	-	-	-	-	-	-	-	-	-	-	-	-	-	-	-
PS(16:0/21:0)	-	-	-	-	-	-	-	-	-	-	-	-	-	-	-	-	-	-
Phenylalanine	-	-	-	-	-	-	-	-	-	-	-	-	-	-	-	-	-	-
L-Histidine	-	-	-	-	-	-	-	-	-	-	-	-	-	-	-	-	-	-
PC(20:5/20:5)	-	-	-	-	-	-	-	-	-	-	-	-	-	-	-	-	-	-
Butyryl Carnitine	-	-	-	-	-	-	-	-	-	-	-	-	-	-	-	-	-	-
3-Deoxyvitamin D3	-	-	-	-	-	-	-	-	-	-	-	-	-	-	-	-	-	-
